# Supplementary material
Source: PubMed Central journal article supplement (PMC2912356)
Supplement: E09-07-0593_1.pdf [file E09-07-0593_1.pdf]

## SUPPLEMENTARY MATERIAL

### Table 1

#### Primary *dhc-1* phenotypic suppression screen results.

The number of larvae produced in each independent test (1-8 as applicable) of all 238 candidate interacting genes is shown.

| Gene name        | WormBase ID | Larvae number |        |        |        |        |        |        |        |
|------------------|-------------|---------------|--------|--------|--------|--------|--------|--------|--------|
|                  |             | test 1        | test 2 | test 3 | test 4 | test 5 | test 6 | test 7 | test 8 |
| <i>act-1</i>     | T04C12.6    | 0             | 0      | 0      | 0      | 0      |        |        |        |
| <i>act-2</i>     | T04C12.5    | 0             | 0      | 0      | 0      |        |        |        |        |
| <i>act-3</i>     | T04C12.4    | 0             | 0      | 0      | 0      | 0      |        |        |        |
| <i>act-4</i>     | M03F4.2     | 0             | 0      | 0      | 0      |        |        |        |        |
| <i>act-5</i>     | T25C8.2     | 0             | 0      | 0      | 0      | 0      |        |        |        |
| <i>air-1</i>     | K07C11.2    | 0             | 0      | 0      |        |        |        |        |        |
| <i>arf-1.2</i>   | B0336.2     | 0             | 2      | 0      | 0      | 4      |        |        |        |
| <i>arf-3</i>     | F57H12.1    | 0             | 0      | 0      | 0      | 0      | 0      |        |        |
| <i>arx-2</i>     | K07C5.1     | 0             | 0      | 0      | 0      | 2      |        |        |        |
| <i>arx-3</i>     | Y79H2A.6    | 0             | 0      | 0      | 0      | 0      |        |        |        |
| <i>arx-5</i>     | Y37D8A.1    | 0             | 0      | 0      | 0      | 0      | 2      |        |        |
| <i>arx-7</i>     | M01B12.3    | 0             | 0      | 0      | 0      | 0      | 0      |        |        |
| <i>atp-2</i>     | C34E10.6    | 0             | 0      | 0      |        |        |        |        |        |
| <i>B0035.4</i>   | B0035.4     | 0             | 0      | 0      |        |        |        |        |        |
| <i>B0035.5</i>   | B0035.5     | 0             | 0      | 0      |        |        |        |        |        |
| <i>ben-1</i>     | C54C6.2     | 0             | 0      | 0      |        |        |        |        |        |
| <i>C01G5.2</i>   | C01G5.2     | 0             | 0      | 5      |        |        |        |        |        |
| <i>C05D11.10</i> | C05D11.10   | 0             | 1      | 0      |        |        |        |        |        |
| <i>C07H6.3</i>   | C07H6.3     | 0             | 0      |        |        |        |        |        |        |
| <i>C10G6.1</i>   | C10G6.1     | 0             | 0      | 1      |        |        |        |        |        |
| <i>C17H12.1</i>  | C17H12.1    | 3             | 0      | 0      | 0      | 0      | 2      |        |        |
| <i>C18E3.6</i>   | C18E3.6     | 0             | 0      | 1      | 0      | 0      | 0      |        |        |
| <i>C28G1.3</i>   | C28G1.3     | 1             | 5      | 0      | 0      |        |        |        |        |
| <i>C30B5.4</i>   | C30B5.4     | 0             | 0      | 0      |        |        |        |        |        |
| <i>C31C9.2</i>   | C31C9.2     | 1             | 1      | 0      | 0      |        |        |        |        |
| <i>C34B2.7</i>   | C34B2.7     | 0             | 0      | 0      |        |        |        |        |        |
| <i>C42C1.10</i>  | C42C1.10    | 0             | 0      | 0      |        |        |        |        |        |
| <i>C43G2.1</i>   | C43G2.1     | 0             | 0      | 0      |        |        |        |        |        |

|                |           |    |    |    |   |   |   |   |   |
|----------------|-----------|----|----|----|---|---|---|---|---|
| C43G2.2        | C43G2.2   | 0  | 0  | 0  |   |   |   |   |   |
| C45G9.5        | C45G9.5   | 0  | 0  | 0  |   |   |   |   |   |
| C47B2.2        | C47B2.2   | 0  | 0  | 0  |   |   |   |   |   |
| C56C10.10      | C56C10.10 | 0  | 0  |    |   |   |   |   |   |
| <i>cap-1</i>   | D2024.6   | 15 | 16 | 35 | 5 | 5 | 6 | 0 |   |
| <i>cap-2</i>   | M106.5    | 19 | 20 | 15 |   |   |   |   |   |
| <i>cas-1</i>   | F41G4.2   | 0  | 0  | 0  | 0 | 2 |   |   |   |
| <i>cdc-42</i>  | R07G3.1   | 0  | 0  | 0  | 0 | 0 | 0 | 0 | 0 |
| <i>cdh-6</i>   | F15B9.7   | 0  | 0  | 0  |   |   |   |   |   |
| <i>cdk-4</i>   | F18H3.5   | 0  | 0  | 0  |   |   |   |   |   |
| <i>chs-1</i>   | T25G3.2   | 0  | 0  | 0  | 0 | 0 | 0 |   |   |
| <i>cls-2</i>   | R107.6    | 0  | 0  |    |   |   |   |   |   |
| <i>cor-1</i>   | R01H10.3  | 1  | 1  | 0  | 0 | 0 |   |   |   |
| <i>cpl-1</i>   | T03E6.7   | 2  | 0  | 0  |   |   |   |   |   |
| <i>cpn-3</i>   | F28H1.2   | 0  | 0  | 0  | 0 | 0 | 0 |   |   |
| <i>csn-5</i>   | B0547.1   | 0  | 0  |    |   |   |   |   |   |
| <i>cts-1</i>   | T20G5.2   | 0  | 0  | 0  | 0 | 0 |   |   |   |
| <i>cyb-1</i>   | ZC168.4   | 0  | 0  | 0  |   |   |   |   |   |
| <i>cyb-2.1</i> | Y43E12A.1 | 0  | 0  | 0  |   |   |   |   |   |
| <i>cye-1</i>   | C37A2.4   | 0  | 0  | 0  |   |   |   |   |   |
| <i>cyk-1</i>   | F11H8.4   | 0  | 0  |    |   |   |   |   |   |
| D1054.3        | D1054.3   | 0  |    |    |   |   |   |   |   |
| <i>daf-4</i>   | C05D2.1   | 0  | 5  | 0  | 0 |   |   |   |   |
| <i>dhc-1</i>   | T21E12.4  | 0  | 0  | 0  |   |   |   |   |   |
| <i>dlc-1</i>   | T26A5.9   | 0  | 0  | 0  | 0 | 5 | 0 | 0 | 0 |
| <i>dli-1</i>   | C39E9.14  | 9  | 11 | 0  |   |   |   |   |   |
| <i>dnc-1</i>   | ZK593.5   | 0  | 0  | 0  |   |   |   |   |   |
| <i>dnj-10</i>  | F22B7.5   | 0  | 0  |    |   |   |   |   |   |
| <i>dpl-1</i>   | T23G7.1   | 5  | 0  | 0  |   |   |   |   |   |
| <i>drp-1</i>   | T12E12.4  | 0  | 0  |    |   |   |   |   |   |
| <i>dsh-2</i>   | C27A2.6   | 0  | 0  | 0  |   |   |   |   |   |
| <i>dyn-1</i>   | C02C6.1   | 0  | 0  | 0  |   |   |   |   |   |
| <i>eea-1</i>   | T10G3.5   | 0  | 0  | 0  |   |   |   |   |   |
| <i>egl-19</i>  | C48A7.1   | 0  | 1  | 0  | 0 |   |   |   |   |
| <i>egl-45</i>  | C27D11.1  | 0  | 0  | 0  |   |   |   |   |   |
| <i>EIF-3.B</i> | Y54E2A.11 | 0  | 0  | 0  |   |   |   |   |   |
| <i>EIF-3.H</i> | C41D11.2  | 0  | 0  | 0  |   |   |   |   |   |
| <i>emb-27</i>  | F10B5.6   | 0  | 0  | 0  |   |   |   |   |   |
| <i>emb-9</i>   | K04H4.1   | 0  | 0  | 0  |   |   |   |   |   |
| <i>epr-1</i>   | T04C10.2  | 0  | 0  | 0  |   |   |   |   |   |

|                 |          |   |   |    |   |   |   |  |  |
|-----------------|----------|---|---|----|---|---|---|--|--|
| <i>F01G4.6</i>  | F01G4.6  | 0 | 4 |    |   |   |   |  |  |
| <i>F09E10.8</i> | F09E10.8 | 0 | 0 | 0  |   |   |   |  |  |
| <i>F10G8.7</i>  | F10G8.7  | 2 | 0 | 0  |   |   |   |  |  |
| <i>F21C3.5</i>  | F21C3.5  | 0 | 0 | 0  | 0 | 0 | 0 |  |  |
| <i>F21D12.3</i> | F21D12.3 | 0 | 0 | 0  |   |   |   |  |  |
| <i>F22B3.4</i>  | F22B3.4  | 0 | 0 | 0  |   |   |   |  |  |
| <i>F23B12.5</i> | F23B12.5 | 0 | 0 | 0  |   |   |   |  |  |
| <i>F25B3.6</i>  | F25B3.6  | 0 | 0 | 0  |   |   |   |  |  |
| <i>F25H2.5</i>  | F25H2.5  | 1 | 0 | 5  | 5 | 0 |   |  |  |
| <i>F26A3.2</i>  | F26A3.2  | 0 | 0 | 0  |   |   |   |  |  |
| <i>F27D4.1</i>  | F27D4.1  | 0 | 0 | 4  |   |   |   |  |  |
| <i>F37C12.3</i> | F37C12.3 | 0 | 0 |    |   |   |   |  |  |
| <i>F38E9.5</i>  | F38E9.5  | 0 | 0 | 2  | 0 | 0 | 0 |  |  |
| <i>F43G9.1</i>  | F43G9.1  | 1 | 0 | 10 |   |   |   |  |  |
| <i>F52B11.3</i> | F52B11.3 | 0 | 0 | 0  | 0 | 0 | 0 |  |  |
| <i>F53B7.3</i>  | F53B7.3  | 0 | 0 | 0  |   |   |   |  |  |
| <i>F54D5.12</i> | F54D5.12 | 0 | 0 | 0  | 0 | 0 | 0 |  |  |
| <i>F58G6.1</i>  | F58G6.1  | 0 | 1 | 0  | 0 | 0 |   |  |  |
| <i>fis-1</i>    | F41G3.4  | 0 | 0 | 0  |   |   |   |  |  |
| <i>fkf-10</i>   | C25A1.2  | 1 | 0 | 0  |   |   |   |  |  |
| <i>gbh-2</i>    | M05D6.7  | 0 | 0 | 0  |   |   |   |  |  |
| <i>gly-2</i>    | C55B7.2  | 0 | 0 | 0  |   |   |   |  |  |
| <i>gop-3</i>    | C34E10.1 | 0 | 0 | 0  |   |   |   |  |  |
| <i>gpb-1</i>    | F13D12.7 | 0 | 0 |    |   |   |   |  |  |
| <i>H37A05.1</i> | H37A05.1 | 0 | 0 | 0  |   |   |   |  |  |
| <i>H43I07.2</i> | H43I07.2 | 5 | 0 | 0  |   |   |   |  |  |
| <i>hda-1</i>    | C53A5.3  | 0 | 0 | 0  | 0 | 0 |   |  |  |
| <i>hel-1</i>    | C26D10.2 | 0 | 0 | 0  |   |   |   |  |  |
| <i>his-26</i>   | ZK131.1  | 1 | 0 | 0  |   |   |   |  |  |
| <i>his-31</i>   | F17E9.12 | 0 | 0 | 0  |   |   |   |  |  |
| <i>his-37</i>   | C50F4.7  | 1 | 0 | 0  |   |   |   |  |  |
| <i>his-38</i>   | K03A1.6  | 0 | 0 | 0  |   |   |   |  |  |
| <i>his-5</i>    | F45F2.3  | 0 | 0 | 0  |   |   |   |  |  |
| <i>his-64</i>   | F22B3.1  | 0 | 0 | 0  |   |   |   |  |  |
| <i>his-67</i>   | T23D8.5  | 1 | 0 | 0  |   |   |   |  |  |
| <i>hmg-1.2</i>  | F47D12.4 | 3 | 5 | 0  |   |   |   |  |  |
| <i>hmp-2</i>    | K05C4.6  | 0 | 0 | 0  |   |   |   |  |  |
| <i>hsp-4</i>    | F43E2.8  | 0 | 0 |    |   |   |   |  |  |
| <i>icd-1</i>    | C56C10.8 | 0 | 0 | 0  |   |   |   |  |  |
| <i>itr-1</i>    | F33D4.2  | 0 | 0 | 0  |   |   |   |  |  |

|                 |          |    |     |    |    |    |    |   |   |
|-----------------|----------|----|-----|----|----|----|----|---|---|
| <i>K01H12.2</i> | K01H12.2 | 0  | 0   |    |    |    |    |   |   |
| <i>K07C5.6</i>  | K07C5.6  | 0  | 0   | 0  |    |    |    |   |   |
| <i>K08E3.3</i>  | K08E3.3  | 0  | 1   | 0  |    |    |    |   |   |
| <i>K08E3.4</i>  | K08E3.4  | 0  | 0   | 0  | 0  | 0  | 0  |   |   |
| <i>K08E3.5</i>  | K08E3.5  | 0  | 0   | 0  | 0  | 0  |    |   |   |
| <i>kin-10</i>   | T01G9.6  | 0  | 0   | 0  |    |    |    |   |   |
| <i>kin-19</i>   | C03C10.1 | 5  | 0   | 2  |    |    |    |   |   |
| <i>kin-2</i>    | R07E4.6  | 0  | 0   |    |    |    |    |   |   |
| <i>klp-11</i>   | F20C5.2  | 0  | 0   | 0  |    |    |    |   |   |
| <i>klp-16</i>   | C41G7.2  | 0  | 0   | 0  | 0  | 0  | 0  |   |   |
| <i>krs-1</i>    | T02G5.9  | 0  | 0   |    |    |    |    |   |   |
| <i>ldb-1</i>    | F58A3.1  | 0  | 0   | 0  |    |    |    |   |   |
| <i>let-23</i>   | ZK1067.1 | 5  | 5   | 0  | 0  |    |    |   |   |
| <i>let-70</i>   | M7.1     | 0  | 5   | 0  | 0  | 0  | 0  | 0 | 0 |
| <i>let-75</i>   | R06C7.10 | 0  | 4   | 0  | 0  | 0  | 0  |   |   |
| <i>let-92</i>   | F38H4.9  | 0  | 0   | 3  | 3  | 0  | 0  | 0 |   |
| <i>lin-11</i>   | ZC247.3  | 0  | 5   | 0  | 0  |    |    |   |   |
| <i>lin-26</i>   | F18A1.2  | 0  | 0   | 0  |    |    |    |   |   |
| <i>lin-3</i>    | F36H1.4  | 0  | 0   | 0  |    |    |    |   |   |
| <i>lin-53</i>   | K07A1.12 | 0  | 0   | 0  |    |    |    |   |   |
| <i>lis-1</i>    | T03F6.5  | 22 | 100 | 90 | 20 | 20 | 30 |   |   |
| <i>lpd-8</i>    | R10H10.1 | 0  | 0   | 0  |    |    |    |   |   |
| <i>M01E5.2</i>  | M01E5.2  | 0  | 0   | 0  |    |    |    |   |   |
| <i>M03C11.4</i> | M03C11.4 | 0  | 0   | 0  |    |    |    |   |   |
| <i>M03F8.3</i>  | M03F8.3  | 0  | 0   | 0  |    |    |    |   |   |
| <i>mag-1</i>    | R09B3.5  | 0  | 0   | 0  |    |    |    |   |   |
| <i>mcm-6</i>    | ZK632.1  | 0  | 0   |    |    |    |    |   |   |
| <i>mec-12</i>   | C44B11.3 | 5  | 0   | 0  |    |    |    |   |   |
| <i>mek-1</i>    | K08A8.1  | 0  | 0   | 0  |    |    |    |   |   |
| <i>mig-10</i>   | F10E9.6  | 5  | 0   | 0  |    |    |    |   |   |
| <i>myo-3</i>    | K12F2.1  | 0  | 0   | 0  | 0  | 0  | 0  |   |   |
| <i>nhr-69</i>   | T23H4.2  | 0  | 0   | 0  |    |    |    |   |   |
| <i>nid-1</i>    | F54F3.1  | 0  | 0   |    |    |    |    |   |   |
| <i>nmy-1</i>    | F52B10.1 | 0  | 0   | 0  | 0  | 5  | 0  |   |   |
| <i>nmy-2</i>    | F20G4.3  | 0  | 0   | 0  |    |    |    |   |   |
| <i>ntl-2</i>    | B0286.4  | 0  | 0   |    |    |    |    |   |   |
| <i>nud-1</i>    | F53A2.4  | 0  | 0   | 0  |    |    |    |   |   |
| <i>osm-3</i>    | M02B7.3  | 0  | 0   |    |    |    |    |   |   |
| <i>paa-1</i>    | F48E8.5  | 0  | 4   | 0  |    |    |    |   |   |
| <i>pam-1</i>    | F49E8.3  | 0  | 0   |    |    |    |    |   |   |

|                 |            |   |   |    |   |   |   |   |   |
|-----------------|------------|---|---|----|---|---|---|---|---|
| <i>pap-1</i>    | Y32F6A.3   | 0 | 0 | 0  | 0 | 0 | 0 |   |   |
| <i>par-1</i>    | H39E23.1   | 0 | 0 | 0  |   | 0 | 0 |   |   |
| <i>par-3</i>    | F54E7.3    | 5 | 5 | 0  | 0 |   |   |   |   |
| <i>par-5</i>    | M117.2     | 0 | 0 |    |   |   |   |   |   |
| <i>pbs-2</i>    | C47B2.4    | 0 |   | 0  |   |   |   |   |   |
| <i>pbs-4</i>    | T20F5.2    | 0 | 0 |    |   |   |   |   |   |
| <i>pbs-5</i>    | K05C4.1    | 0 | 0 |    |   |   |   |   |   |
| <i>pbs-7</i>    | F39H11.5   | 0 | 0 |    |   |   |   |   |   |
| <i>pes-8</i>    | F18G5.2    | 0 | 0 | 0  |   |   |   |   |   |
| <i>pfn-3</i>    | K03E6.6    | 0 | 0 | 0  | 0 | 0 | 0 |   |   |
| <i>pha-4</i>    | F38A6.1    | 0 | 2 | 0  |   |   |   |   |   |
| <i>pkc-3</i>    | F09E5.1    | 0 | 0 | 0  |   |   |   |   |   |
| <i>ppk-3</i>    | VF11C1L.1  | 0 | 0 | 0  |   |   |   |   |   |
| <i>ptp-3</i>    | C09D8.1    | 1 | 5 | 0  | 1 |   |   |   |   |
| <i>R05G6.7</i>  | R05G6.7    | 0 | 0 |    |   |   |   |   |   |
| <i>R09E12.3</i> | R09E12.3   | 0 | 5 | 0  | 0 |   |   |   |   |
| <i>R144.4</i>   | R144.4     | 0 | 0 | 0  | 0 | 0 |   |   |   |
| <i>R151.9</i>   | R151.9     | 2 | 3 | 10 | 1 | 0 | 0 |   |   |
| <i>R186.1</i>   | R186.1     | 0 | 0 |    |   |   |   |   |   |
| <i>rab-1</i>    | C39F7.4    | 0 | 0 | 0  |   |   |   |   |   |
| <i>rab-5</i>    | F26H9.6    | 0 | 0 | 0  |   |   |   |   |   |
| <i>rab-7</i>    | W03C9.3    | 0 | 0 | 0  |   |   |   |   |   |
| <i>rad-51</i>   | Y43C5A.6   | 0 | 0 | 0  |   |   |   |   |   |
| <i>ran-1</i>    | K01G5.4    | 0 | 0 | 0  | 0 | 0 | 0 | 0 | 0 |
| <i>rba-1</i>    | K07A1.11   | 0 | 0 | 0  |   |   |   |   |   |
| <i>rbx-1</i>    | ZK287.5    | 0 | 0 | 0  |   |   |   |   |   |
| <i>rcq-5</i>    | E03A3.2    | 0 | 0 |    |   |   |   |   |   |
| <i>rnp-4</i>    | R07E5.14   | 0 | 1 | 0  | 0 |   |   |   |   |
| <i>rnr-1</i>    | T23G5.1    | 0 | 0 | 0  |   |   |   |   |   |
| <i>rpl-10</i>   | F10B5.1    | 0 | 1 | 0  |   |   |   |   |   |
| <i>rpl-23</i>   | B0336.10   | 0 | 0 |    |   |   |   |   |   |
| <i>rpl-7</i>    | F53G12.10  | 0 | 0 | 0  |   |   |   |   |   |
| <i>rpn-3</i>    | C30C11.2   | 0 | 0 | 0  | 0 | 0 |   |   |   |
| <i>rpn-6</i>    | F57B9.10   | 0 | 0 | 0  |   |   |   |   |   |
| <i>rpn-8</i>    | R12E2.3    | 0 | 0 | 0  |   |   |   |   |   |
| <i>rpn-9</i>    | T06D8.8    | 0 | 0 | 0  |   |   |   |   |   |
| <i>rps-0</i>    | B0393.1    | 0 | 0 | 0  |   |   |   |   |   |
| <i>rps-1</i>    | F56F3.5    | 0 | 0 | 0  |   |   |   |   |   |
| <i>rps-18</i>   | Y57G11C.16 | 0 | 0 |    |   |   |   |   |   |
| <i>rpt-1</i>    | C52E4.4    | 0 | 0 | 0  |   |   |   |   |   |

|                 |            |   |   |   |   |   |   |   |   |
|-----------------|------------|---|---|---|---|---|---|---|---|
| <i>rpt-3</i>    | F23F12.6   | 0 | 0 | 0 | 0 | 0 | 0 | 0 | 0 |
| <i>rpt-6</i>    | Y49E10.1   | 0 | 0 | 0 |   |   |   |   |   |
| <i>set-5</i>    | F35G12.3   | 0 | 0 | 0 | 0 | 1 |   |   |   |
| <i>sem-5</i>    | C14F5.5    | 0 | 0 | 0 |   |   |   |   |   |
| <i>snr-1</i>    | Y116A8C.42 | 0 | 0 | 0 |   |   |   |   |   |
| <i>snr-3</i>    | T28D9.10   | 0 | 0 | 0 |   |   |   |   |   |
| <i>snt-1</i>    | F31E8.2    | 0 | 0 | 0 |   |   |   |   |   |
| <i>sqv-4</i>    | F29F11.1   | 0 | 0 | 0 |   |   |   |   |   |
| <i>sur-6</i>    | F26E4.1    | 0 | 0 | 0 |   |   |   |   |   |
| <i>T01B11.4</i> | T01B11.4   | 0 | 0 |   |   |   |   |   |   |
| <i>T04C9.1</i>  | T04C9.1    | 0 | 0 | 0 | 0 | 0 |   |   |   |
| <i>T09A5.9</i>  | T09A5.9    | 0 | 0 |   |   |   |   |   |   |
| <i>T09E8.3</i>  | T09E8.3    | 0 | 0 | 0 |   |   |   |   |   |
| <i>T21B10.7</i> | T21B10.7   | 0 | 0 | 0 |   |   |   |   |   |
| <i>T22B11.5</i> | T22B11.5   | 0 | 0 | 0 | 0 | 0 | 0 | 1 | 0 |
| <i>T22D1.3</i>  | T22D1.3    | 1 | 1 | 0 |   |   |   |   |   |
| <i>T22F3.3</i>  | T22F3.3    | 0 | 0 | 1 | 1 | 0 |   |   |   |
| <i>tag-138</i>  | F08A8.6    | 0 | 0 | 0 | 0 | 0 |   |   |   |
| <i>tag-216</i>  | K08F9.2    | 0 | 0 | 0 | 0 | 0 |   |   |   |
| <i>tba-1</i>    | F26E4.8    | 0 | 0 | 0 |   |   |   |   |   |
| <i>tba-2</i>    | C47B2.3    | 0 | 0 | 0 |   |   |   |   |   |
| <i>tba-4</i>    | F44F4.11   | 5 | 5 | 0 | 1 |   |   |   |   |
| <i>tbb-1</i>    | K01G5.7    | 5 | 0 | 0 |   |   |   |   |   |
| <i>tbb-2</i>    | C36E8.5    | 0 | 0 | 0 |   |   |   |   |   |
| <i>tbb-4</i>    | B0272.1    | 5 | 5 | 0 | 0 |   |   |   |   |
| <i>tbg-1</i>    | F58A4.8    | 0 | 0 | 0 | 0 | 0 | 0 |   |   |
| <i>tfg-1</i>    | Y63D3A.5   | 0 | 0 | 0 |   |   |   |   |   |
| <i>top-1</i>    | M01E5.5    | 0 | 0 | 0 |   |   |   |   |   |
| <i>tre-1</i>    | F57B10.7   | 0 | 0 | 1 |   |   |   |   |   |
| <i>ula-1</i>    | C26E6.8    | 0 | 0 | 0 |   |   |   |   |   |
| <i>unc-116</i>  | R05D3.7    | 1 | 0 | 0 |   |   |   |   |   |
| <i>unc-32</i>   | ZK637.8    | 0 | 0 |   |   |   |   |   |   |
| <i>unc-37</i>   | W02D3.9    | 0 | 0 | 0 | 0 |   |   |   |   |
| <i>unc-52</i>   | ZC101.2    | 0 | 0 | 0 |   |   |   |   |   |
| <i>unc-73</i>   | F55C7.7    | 0 | 0 | 0 |   |   |   |   |   |
| <i>unc-78</i>   | C04F6.4    | 0 | 2 | 0 | 0 | 0 |   |   |   |
| <i>vab-10</i>   | ZK1151.1   | 0 | 0 | 0 | 0 | 0 | 0 |   |   |
| <i>vbp-1</i>    | T06G6.9    | 0 | 3 | 5 | 0 | 0 | 0 |   |   |
| <i>vha-1</i>    | R10E11.8   | 0 | 0 |   |   |   |   |   |   |
| <i>vha-12</i>   | F20B6.2    | 0 | 0 | 0 |   |   |   |   |   |

|              |            |   |   |   |   |   |   |  |  |
|--------------|------------|---|---|---|---|---|---|--|--|
| <i>vha-2</i> | R10E11.2   | 0 | 0 |   |   |   |   |  |  |
| VW02B12L.3   | VW02B12L.3 | 0 | 0 | 0 |   |   |   |  |  |
| W01A11.2     | W01A11.2   | 0 |   | 0 |   |   |   |  |  |
| W02D3.6      | W02D3.6    | 0 | 0 | 0 |   |   |   |  |  |
| <i>wve-1</i> | R06C1.3    | 0 | 0 | 0 |   |   |   |  |  |
| Y49A3A.1     | Y49A3A.1   | 0 | 0 |   |   |   |   |  |  |
| Y49E10.2     | Y49E10.2   |   | 0 | 0 |   |   |   |  |  |
| Y66H1B.2     | Y66H1B.2   | 1 | 0 | 0 |   |   |   |  |  |
| ZK1128.4     | ZK1128.4   | 0 | 0 | 0 |   |   |   |  |  |
| ZK370.3      | ZK370.3    | 0 | 0 | 0 | 0 | 0 | 0 |  |  |

## Table 2

### Re-screen results for candidate *dhc-1* phenotypic suppressors.

The number of larvae (mean of at least three independent experiments) produced in a first or second 24-hour period of RNAi feeding for all positive candidates from the primary screens (Table 1). Genes are ordered by effectiveness of suppression by RNAi in the first 24-hour period. Gene names (when available) or Wormbase ID are listed (wormbase.org)

| Gene name         | average number of progeny after 24 hours | average number of progeny after 48 hours |
|-------------------|------------------------------------------|------------------------------------------|
| OP50 (neg. ctrl.) | 0                                        | 0                                        |
| <i>lis-1</i>      | 25.5                                     | 9.7                                      |
| <i>cap-2</i>      | 9.5                                      | 5.3                                      |
| <i>cap-1</i>      | 6.2                                      | 9.4                                      |
| <i>dli-1</i>      | 4.2                                      | 0.0                                      |
| <i>vbp-1</i>      | 1.9                                      | 0.2                                      |
| <i>C08F8.1</i>    | 0.6                                      | 2.5                                      |
| <i>R151.9</i>     | 0.5                                      | 1.9                                      |
| <i>C17H12.1</i>   | 0.4                                      | 0.0                                      |
| <i>F21C3.5</i>    | 0.3                                      | 1.6                                      |
| <i>B0035.4</i>    | 0.3                                      | 1.3                                      |
| <i>tba-4</i>      | 0.3                                      | 0.0                                      |
| <i>dnc-1</i>      | 0.1                                      | 0.0                                      |
| <i>tba-5</i>      | 0.1                                      | 0.2                                      |
| <i>H43I07.2</i>   | 0.0                                      | 0.5                                      |
| <i>cbp-3</i>      | 0.0                                      | 0.7                                      |
| <i>wsp-1</i>      | 0.0                                      | 0.9                                      |
| <i>tbb-4</i>      | 0.0                                      | 0.8                                      |
| <i>mec-12</i>     | 0.0                                      | 0.9                                      |
| <i>C43G2.2</i>    | 0.0                                      | 0.2                                      |
| <i>pus-1</i>      | 0.0                                      | 0.2                                      |
| <i>T22D1.3</i>    | 0.0                                      | 0.0                                      |
| <i>ptp-3</i>      | 0.0                                      | 0.6                                      |
| <i>C01G5.2</i>    | 0.0                                      | 0.1                                      |
| <i>his-26</i>     | 0.0                                      | 0.1                                      |
| <i>R09E1.2</i>    | 0.0                                      | 0.2                                      |
| <i>lin-11</i>     | 0.0                                      | 0.1                                      |
| <i>F25H2.5</i>    | 0.0                                      | 0.1                                      |



|                  |     |     |
|------------------|-----|-----|
| <i>tbb-6</i>     | 0.0 | 0.1 |
| <i>pfn-2</i>     | 0.0 | 0.1 |
| <i>pes-8</i>     | 0.0 | 0.3 |
| <i>rnp-4</i>     | 0.0 | 0.5 |
| <i>K08E3.3</i>   | 0.0 | 0.4 |
| <i>F43G9.1</i>   | 0.0 | 0.3 |
| <i>F5405.12</i>  | 0.0 | 0.1 |
| <i>cct-5</i>     | 0.3 | 0.0 |
| <i>F58G6.1</i>   | 0.0 | 0.0 |
| <i>cpn-3</i>     | 0.0 | 0.0 |
| <i>tba-2</i>     | 0.0 | 0.0 |
| <i>him-1</i>     | 0.0 | 0.0 |
| <i>unc-116</i>   | 0.0 | 0.0 |
| <i>dlc-1</i>     | 0.0 | 0.0 |
| <i>nud-1</i>     | 0.0 | 0.0 |
| <i>rnh-1.0</i>   | 0.0 | 0.0 |
| <i>pfn-3</i>     | 0.0 | 0.0 |
| <i>tba-8</i>     | 0.0 | 0.0 |
| <i>tba-9</i>     | 0.0 | 0.0 |
| <i>klp-11</i>    | 0.0 | 0.0 |
| <i>Y66H1B.2</i>  | 0.0 | 0.0 |
| <i>cpl-1</i>     | 0.0 | 0.0 |
| <i>tbb-1</i>     | 0.0 | 0.0 |
| <i>fkx-1.0</i>   | 0.0 | 0.0 |
| <i>let-92</i>    | 0.0 | 0.0 |
| <i>hmg-1.2</i>   | 0.0 | 0.0 |
| <i>his-37</i>    | 0.0 | 0.0 |
| <i>C10G6.1</i>   | 0.0 | 0.0 |
| <i>C05D11.10</i> | 0.0 | 0.0 |
| <i>rpl-10</i>    | 0.0 | 0.0 |
| <i>daf-4</i>     | 0.0 | 0.0 |
| <i>mig-10</i>    | 0.0 | 0.0 |
| <i>C28G1.3</i>   | 0.0 | 0.0 |
| <i>pha-4</i>     | 0.0 | 0.0 |
| <i>eea-1</i>     | 0.0 | 0.0 |
| <i>his-67</i>    | 0.0 | 0.0 |
| <i>1-Apr</i>     | 0.0 | 0.0 |
| <i>pfn-1</i>     | 0.0 | 0.0 |
| <i>T09E8.3</i>   | 0.0 | 0.0 |
| <i>par-3</i>     | 0.0 | 0.0 |

|                 |     |     |
|-----------------|-----|-----|
| <i>T22B11.3</i> | 0.0 | 0.0 |
| <i>C18E3.6</i>  | 0.0 | 0.0 |
| <i>C47B2.2</i>  | 0.0 | 0.0 |
| <i>cas-1</i>    | 0.0 | 0.0 |
| <i>cor-1</i>    | 0.0 | 0.0 |
| <i>arf-1.2</i>  | 0.0 | 0.0 |
| <i>arf-3</i>    | 0.0 | 0.0 |
| <i>arx-5</i>    | 0.0 | 0.0 |
| <i>arx-7</i>    | 0.0 | 0.0 |
| <i>F01G4.6</i>  | 0.0 | 0.0 |
| <i>F10G8.7</i>  | 0.0 | 0.0 |
| <i>F38E9.5</i>  | 0.0 | 0.0 |
| <i>wve-1</i>    | 0.0 | 0.0 |
| <i>zyg-9</i>    | 0.0 | 0.0 |
| <i>osm-3</i>    | 0.0 | 0.0 |
| <i>pap-1</i>    | 0.0 | 0.0 |
| <i>cct-1</i>    | 0.0 | 0.0 |
| <i>cct-4</i>    | 0.0 | 0.0 |
| <i>W0D23.6</i>  | 0.0 | 0.0 |
| <i>sem-5</i>    | 0.0 | 0.0 |
| <i>tac-1</i>    | 0.0 | 0.0 |
| <i>let-70</i>   | 0.0 | 0.0 |
| <i>let-75</i>   | 0.0 | 0.0 |

## Supplementary Figures

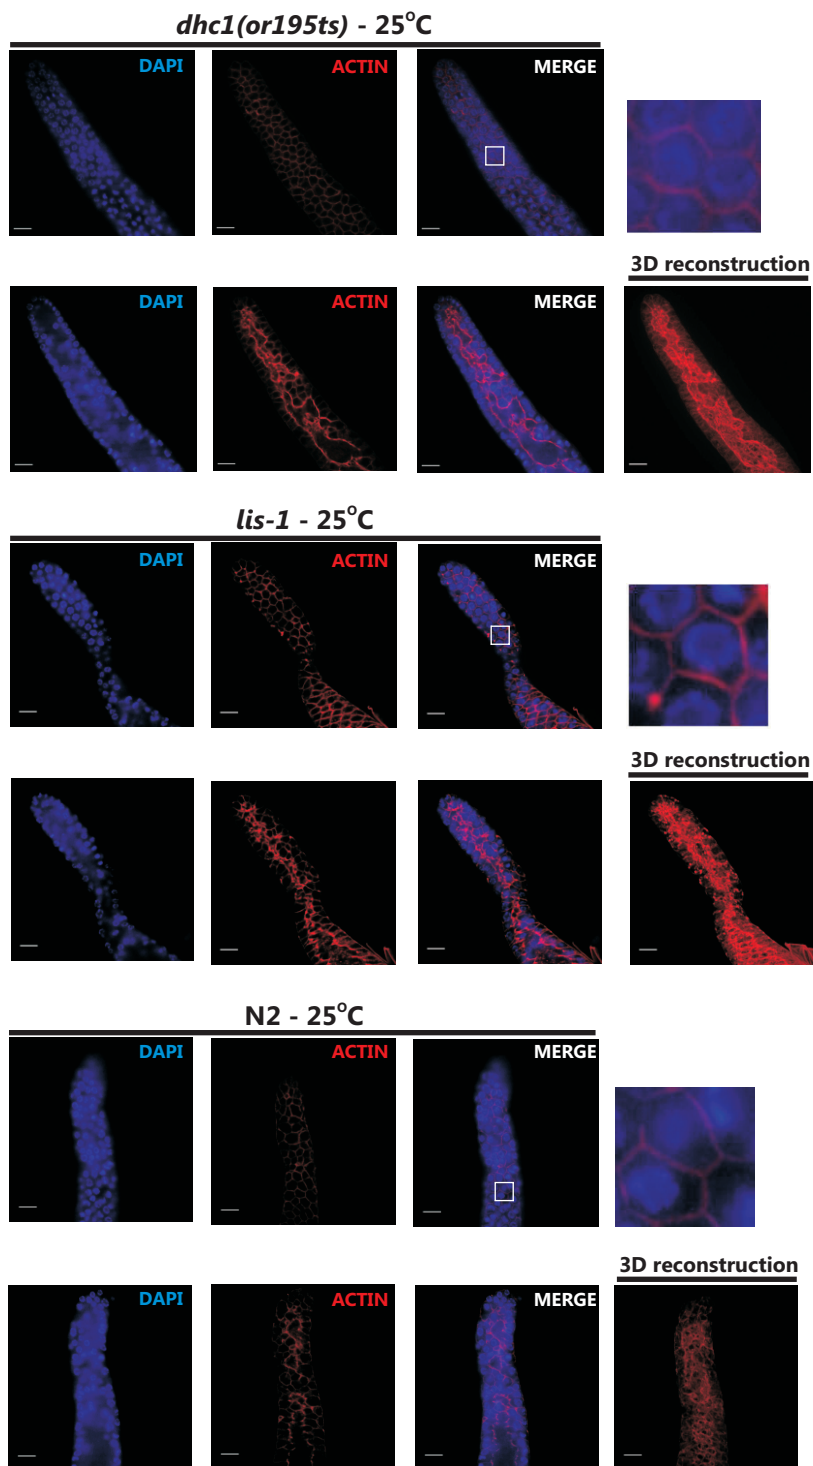

### Supplementary Figure 1. Mutations of *dhc-1* and *lis-1* did not show significant changes in F-actin organization in the mitotic and transition regions of the germline.

Phalloidin-rhodamine and Hoechst staining of extruded gonads was used to visualize F-actin (red) and DNA (blue), respectively. A single optical section of the distal part of the gonad and magnification of the single nuclei is showed in the upper row of each panel. Middle section of the gonad and 3D reconstruction of the rachis showed in the lower row of the appropriate panel. Scale bar 10  $\mu$ M.

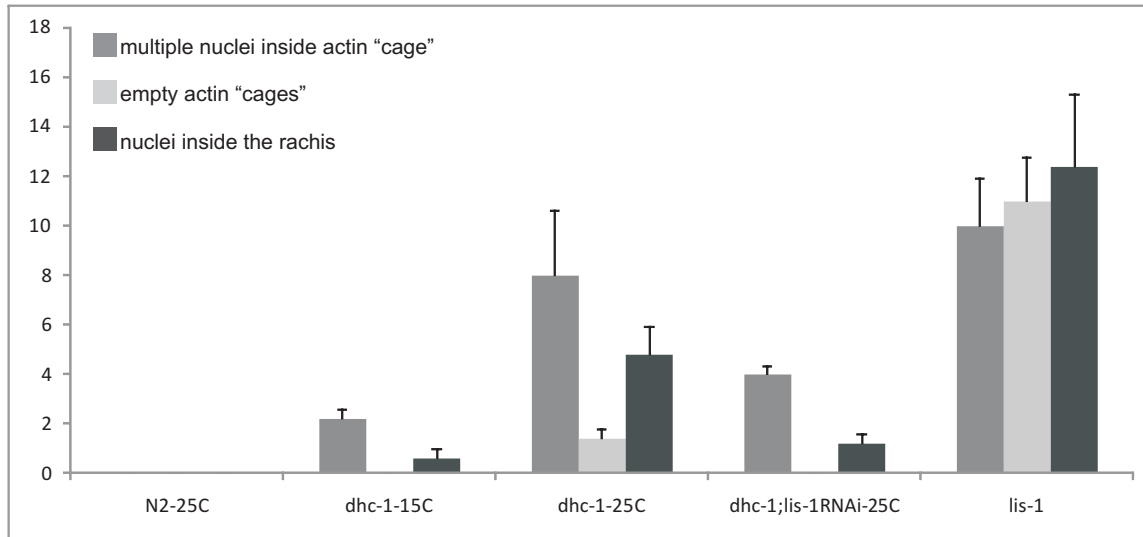

**Supplementary Figure 2. Quantification of cytoskeletal nuclear architecture in the pachytene region of the germline.**

Quantification of number of nuclei in the rachis of 24 hour adult animals. Average number of multiple-nuclei actin cages (dark gray), empty actin cages (gray) and free nuclei (black) is shown. Error bars represent  $\pm$ S.E.M.

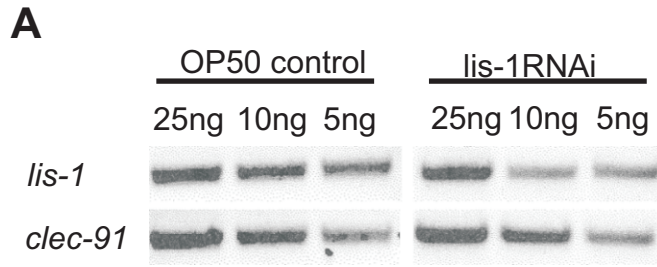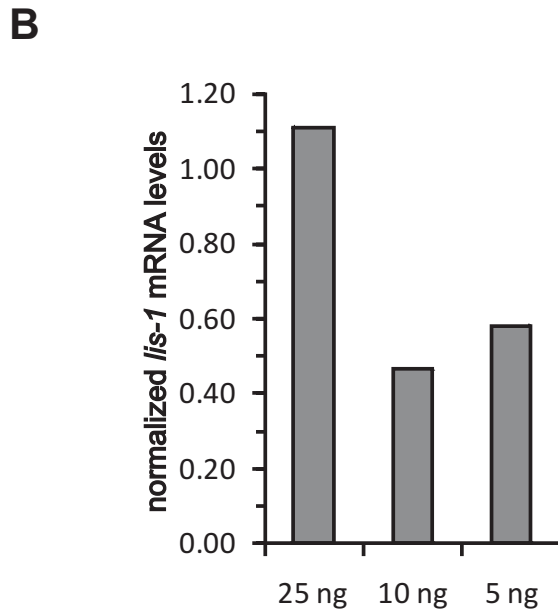

**Supplementary Figure 3. Quantification of depletion of *lis-1* mRNA by RNAi.**

A) RT-PCR analysis of *lis-1* mRNA levels in total RNA isolated from L4 worms cultured for 24 hours on control (OP50) or *lis-1* (RNAi) bacteria. *clec-91* (ZK858.3) was used as loading control. Various amounts of template RNA (25, 10 and 5 ng) were added to parallel reactions. B) Quantitation of relative *lis-1* mRNA levels, normalized to control, in each *lis-1*(RNAi) sample.
